# Supplementary material for: TERT Promoter Mutations as Simple and Non-Invasive Urinary Biomarkers for the Detection of Urothelial Bladder Cancer in a High-Risk Region
Source: MDPI journal article supplement (doi:10.3390/ijms232214319), 2022-11-18
Supplement: s1 [file s1]

**Table S1.** ddPCR probes and primers for detecting TERT promoter mutations

| Mutation type           | Primer/probe | Sequence (5' to 3')  | Fluorescent Dye and quencher | PCR Product Size (bp) |
|-------------------------|--------------|----------------------|------------------------------|-----------------------|
| <i>TERT</i> C228T       | fw_primer    | CCCTCCCGGGTCC        | -                            | 64                    |
|                         | rev_primer   | CCGCGGAAAGGAAGG      | -                            |                       |
|                         | wt_probe     | CGGAgGGGGCTGG        | HEX_lowaBlack                |                       |
|                         | mut_probe    | CCCGGAaGGGGCTG       | FAM_lowaBlack                |                       |
| <i>TERT</i> C250T       | fw_primer    | TCCAGCTCCGCCTCCTCC   | -                            | 109                   |
|                         | rev_primer   | GGGCCGCGGAAAGGAAGG   | -                            |                       |
|                         | wt_probe     | TCCCGACCCCTcCCGGGTCC | HEX_lowaBlack                |                       |
|                         | mut_probe    | TCCCGACCCCTtCCGGGTCC | FAM_lowaBlack                |                       |
| <i>TERT</i> C228A       | fw_primer    | CGCGGAAAGGAAGGG      | -                            | 64                    |
|                         | rev_primer   | CCCCTCCCGGGTC        | -                            |                       |
|                         | wt_probe     | CGGAgGGGGCTGG        | HEX_lowaBlack                |                       |
|                         | mut_probe    | CCCGGAtGGGGCTG       | FAM_lowaBlack                |                       |
| <i>TERT</i> CC242-243TT | fw_primer    | GAGGGCCCGGAGG        | -                            | 88                    |
|                         | rev_primer   | CTTCACCTTCCAGCTCC    | -                            |                       |
|                         | wt_probe     | CTGGGCCGGgAC         | HEX_lowaBlack                |                       |
|                         | mut_probe    | CCGGaaACCCGGGA       | FAM_lowaBlack                |                       |
| <i>TERT</i> A161C       | fw_primer    | CGGACCCCGCCCCGT      | -                            | 154                   |
|                         | rev_primer   | CCAGGGCTTCCACGTGC    | -                            |                       |
|                         | wt_probe     | CAGCGCTGCCGGAAACTCG  | HEX_lowaBlack                |                       |
|                         | mut_probe    | CAGCGCTGCCTGAAACTCGC | FAM_lowaBlack                |                       |

Fw: Forward; rev: Reverse; wt: Wild-type; mut: Mutated.

ddPCR probes containing either a 5'-FAM or 5'-HEX reporter dye and 3' Iowa Black® Fluorescent quencher were HPLC purified.

**Table S2.** Distribution of demographics and selected exposures among patients with primary and recurrent bladder cancer

| <b>Characteristic</b>           | <b>Primary BC (total n=11)<br/>N (%)</b> | <b>Recurrent BC (total n= 20)<br/>N (%)</b> | <b>P-value</b> |
|---------------------------------|------------------------------------------|---------------------------------------------|----------------|
| <b>Age (years) <sup>1</sup></b> | 62.2 ± 7.22                              | 66.05 ± 10.5                                | 0.301          |
| <b>Sex</b>                      |                                          |                                             | 1.000          |
| Male                            | 9 (81%)                                  | 17 (85%)                                    |                |
| Female                          | 2 (18%)                                  | 3 (15%)                                     |                |
| <b>Active smoking</b>           | 11 (100%)                                | 15 (75%)                                    | 0.070          |
| <b>Opium use</b>                | 10 (91%)                                 | 14 (70%)                                    | 0.183          |
| <b>Hematuria</b>                |                                          |                                             | 0.173          |
| Gross                           | 9 (81%)                                  | 10 (50%)                                    |                |
| Microscopic                     | 2 (18%)                                  | 7 (35%)                                     |                |
| <b>Tumor stage</b>              |                                          |                                             | 0.676          |
| MIBC <sup>2</sup>               | 3 (27%)                                  | 4 (20%)                                     |                |
| NMIBC <sup>3</sup>              | 8 (73%)                                  | 16 (80%)                                    |                |
| <b>Tumor grade</b>              |                                          |                                             | 0.809          |
| Low grade                       | 6 (54%)                                  | 10 (50%)                                    |                |
| High grade                      | 5 (45%)                                  | 10 (50%)                                    |                |
| <b>Urine cytology</b>           |                                          |                                             | 1.000          |
| Positive                        | 8 (73%)                                  | 13 (65%)                                    |                |
| Negative                        | 3 (27%)                                  | 7 (35%)                                     |                |

1: Age is illustrated as median ± standard deviation

2. MIBC: Muscle-invasive bladder cancer

3. NMIBC: Non Muscle-invasive bladder cancer

**Table S3.** Distribution of the subtypes of TERT promoter mutations detected by ddPCR among participants in the case and control groups

| Mutation type           | Case group (total n=31)<br>N (%) | Control group (total n= 50)<br>N (%) | P-value |
|-------------------------|----------------------------------|--------------------------------------|---------|
| <i>TERT</i> C228T       | 18 (58%)                         | 4 (8%)                               | <0.001  |
| <i>TERT</i> C250T       | 4 (13%)                          | 1 (2%)                               | 0.068   |
| <i>TERT</i> C228A       | 0                                | 0                                    | -       |
| <i>TERT</i> CC242-243TT | 0                                | 0                                    | -       |
| <i>TERT</i> A161C       | 0                                | 1 (2%)                               | 0.617   |
| Any of the above        | 20 (64.5%)                       | 6 (12%)                              | <0.001  |

**Figure S1.** Sanger sequencing Chromatogram of the *TERT* promoter sequence of the KER-0023 urinary DNA sample identifying the C158A mutation.

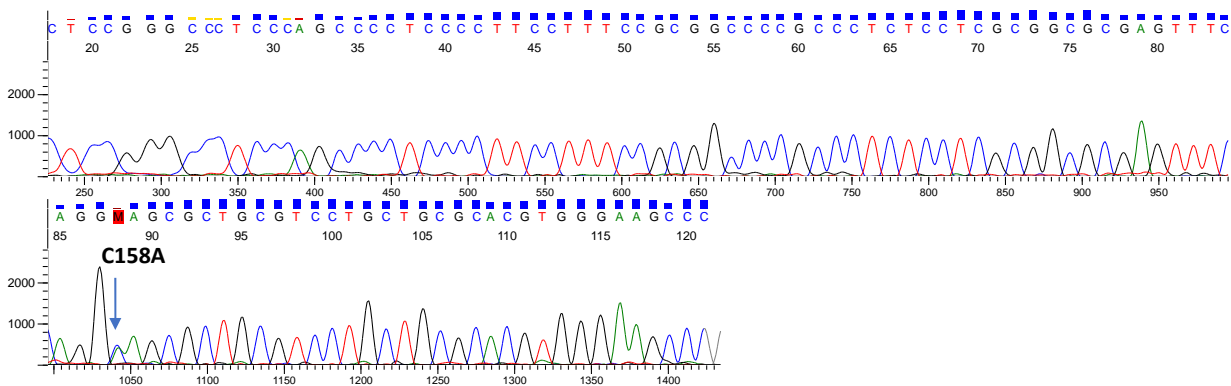

The Mutant Allelic Fraction (MAF) of the C158A in the urinary DNA of this BC case is estimated to be at 50%.
